## CORRECTION

# Correction: Influence of the shared epitope on the elicitation of experimental autoimmune arthritis biomarkers

Anastasios Karydis, Indra Sandal, Jiwen Luo, Amanda Prislovsky, Amanda Gamboa, Edward F. Rosloniec, David D. Brand

[S3](#) and [S6](#) Figs were mistakenly swapped, as were [S4](#) and [S7](#) Figs respectively. The correctly ordered files can be viewed below.

## Supporting information

**S3 Fig. Animation of 360° rotation of knee demonstrating *P. gingivalis*-mediated bone loss.** Bone loss can be seen in three-dimensional animation of  $\mu$ CT reconstructions of the left knee joint from a DR4-bearing mouse treated with *P. gingivalis* (joint depicted in the upper left of Fig 6).

(MOV)

**S4 Fig. Animation of 360° rotation of knee demonstrating *P. gingivalis*-mediated bone loss.** Bone loss can be seen in three-dimensional animation of  $\mu$ CT reconstructions of the right knee joint from a DR4-bearing mouse treated with *P. gingivalis* (joint depicted in the upper right of Fig 6).

(MOV)

**S6 Fig. Animation of 360° rotation of knee from untreated mouse.** Normal bone structure can be seen in three-dimensional animation of  $\mu$ CT reconstructions of the left knee joint from an untreated DR4-bearing mouse.

(MOV)

**S7 Fig. Animation of 360° rotation of knee from untreated mouse.** Normal bone structure can be seen in three-dimensional animation of  $\mu$ CT reconstructions of the right knee joint from an untreated DR4-bearing mouse.

(MOV)

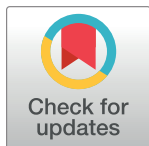

## OPEN ACCESS

**Citation:** Karydis A, Sandal I, Luo J, Prislovsky A, Gamboa A, Rosloniec EF, et al. (2022) Correction: Influence of the shared epitope on the elicitation of experimental autoimmune arthritis biomarkers. PLoS ONE 17(2): e0263754. <https://doi.org/10.1371/journal.pone.0263754>

**Published:** February 2, 2022

**Copyright:** © 2022 Karydis et al. This is an open access article distributed under the terms of the [Creative Commons Attribution License](https://creativecommons.org/licenses/by/4.0/), which permits unrestricted use, distribution, and reproduction in any medium, provided the original author and source are credited.

## Reference

1. Karydis A, Sandal I, Luo J, Prislovsky A, Gamboa A, Rosloniec EF, et al. (2021) Influence of the shared epitope on the elicitation of experimental autoimmune arthritis biomarkers. PLoS ONE 16(4): e0250177. <https://doi.org/10.1371/journal.pone.0250177> PMID: 33857232
